# Supplementary material for: Antibody and DNA sensing pathways converge to activate the inflammasome during primary human macrophage infection
Source: PubMed Central journal article supplement (PMC6826209; doi:10.15252/embj.2018101365), 2019-08-29

Figure 4D

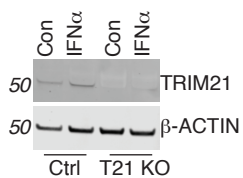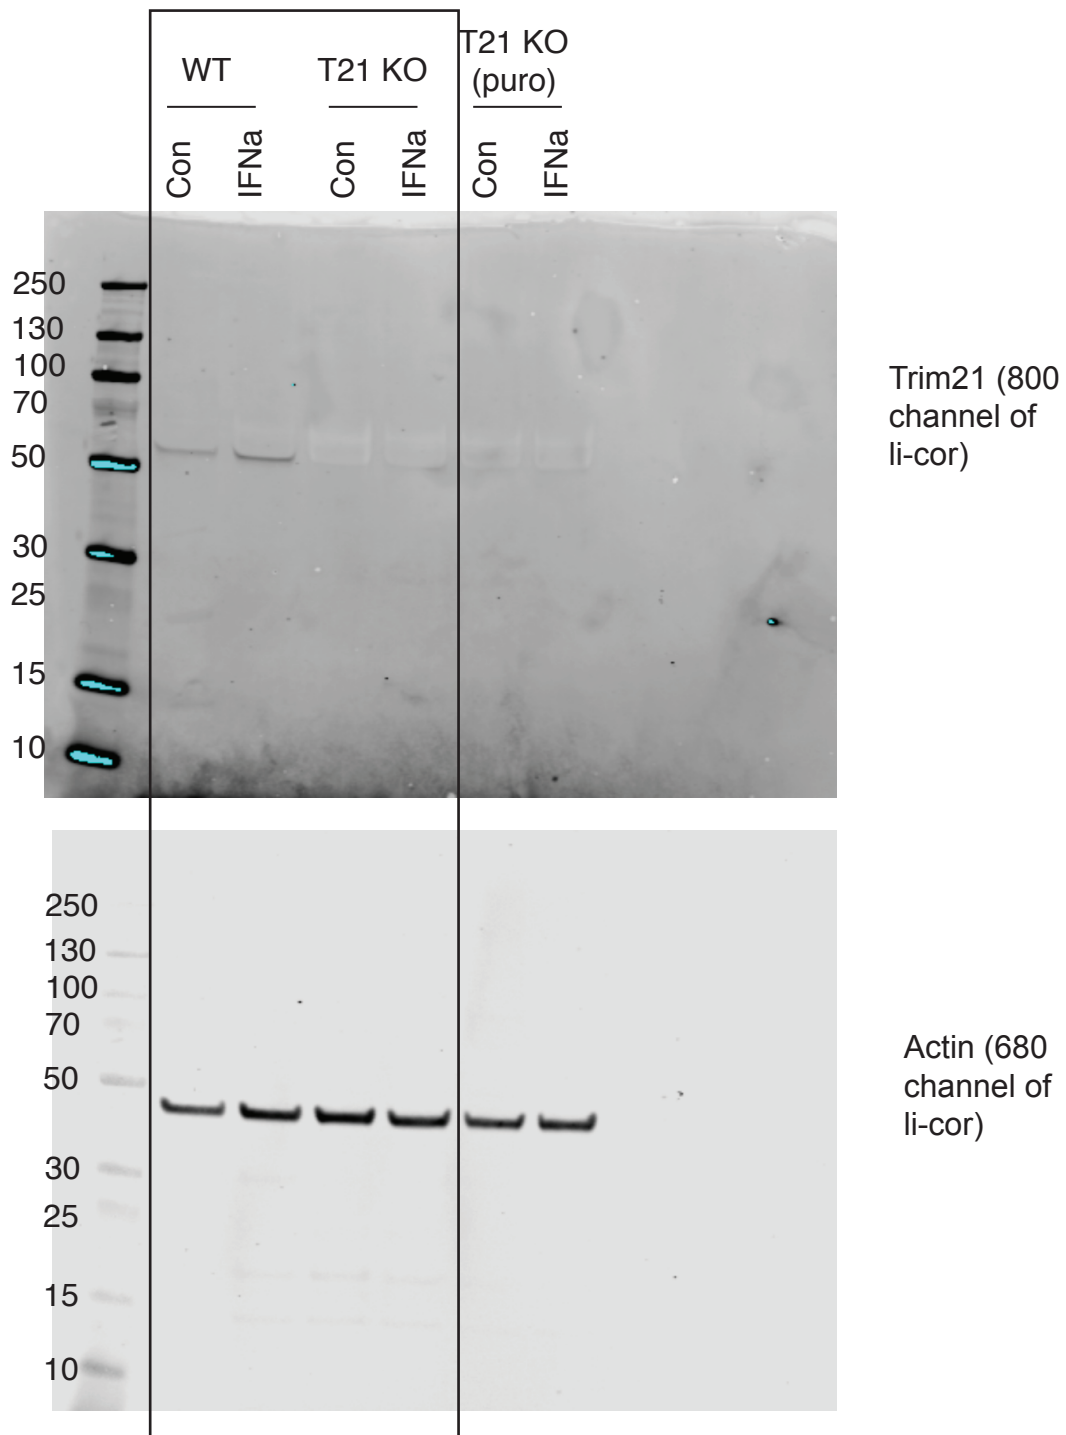

Supplement: EMBJ-38-e101365-s002.pdf [file EMBJ-38-e101365-s002.pdf]
